# Supplementary material for: Transgenic Expression of Entire Hepatitis B Virus in Mice Induces Hepatocarcinogenesis Independent of Chronic Liver Injury
Source: PubMed Central journal article supplement (PMC3192172; doi:10.1371/journal.pone.0026240), 2011-10-12
Supplement: pone.0026240.s002.pdf [file pone.0026240.s002.pdf]

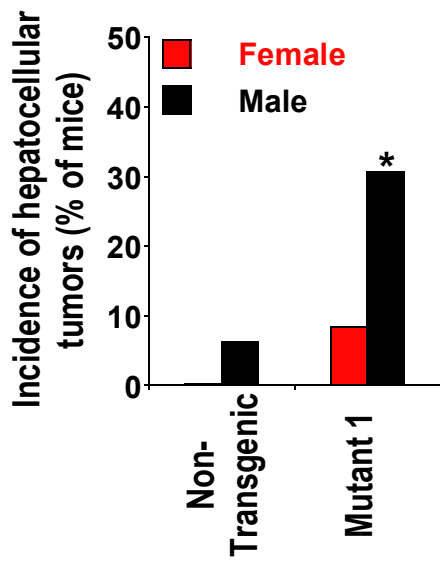

**Figure S2. Male preponderance of HCC in Mutant 1 mice.** Shown is the incidence of HCC in Mutant 1 mice (49 male and 15 female) and non-transgenic littermates (33 male and 13 female) at 2 years of age. Significant difference between the male and female Mutant 1 mice is indicated by an asterisk ( $P < 0.05$ ).
