# Supplementary material for: Transgenic Expression of Entire Hepatitis B Virus in Mice Induces Hepatocarcinogenesis Independent of Chronic Liver Injury
Source: PubMed Central journal article supplement (PMC3192172; doi:10.1371/journal.pone.0026240), 2011-10-12
Supplement: pone.0026240.s004.pdf [file pone.0026240.s004.pdf]

5' -CTGCTGGGTGACCTGGCTGCCCTGCCCGCCGATCTGAGAACCCGTAAGCGGGATCTTGACC  
GCGGGGAATGGTATCTGGAGCCCGCAAACCTGCCGCTCAGCGGGTATACATTTAAACCCTAACA  
AAACAAAAGATGGGGTTATTCCTAAACTTCATGGGTACATAATTGGAAGTTGGGGAACGTT  
GCCACAGGATCATATTGTACAAAAGATCAAACACTGTTTTAGAAAACCTCCTGTTAACAGGCCT  
ATTGATTGGAAAGTATGTCAAAGAATTGTGGGTCTTTTGGGCTTTGCTGCTCCATTTACACAAT  
GTGGATATCCTGCCTTAATGCCTTTGTATGCATGTATAACAAGCTAAACAGGCTTTCACCTTCTC  
GCCAACTTACAAGGCCTTTCTAAGTAAACAGTACATGAACCTTTACCCCGTTGCTCGGCAACGG  
CCTGGTCTGTGCCAAGTGTGGCTGACGCAACCCCACTGGCTGGGGCTTGCCATAGGCCATC  
AGCGCATGCGTGGAACCTTTGTGGCTCCTCTGCCGATCCATACTGCGGAACTCCTAGCCGTTGT  
TTTTGCT-3'

**Figure S4.** Sequences at the junction of HBV (red) and mouse genomic (green) DNA in Mutant 1 Line-7 mice. The data is derived from sequencing the PCR product shown in Figure 6A. The DNA sequence in green is identical to 106,650,370-106,650,471 of mouse chromosome 11, which is located in 11qE1 region (UCSC Genome Browser).
