# Supplementary material for: Transgenic Expression of Entire Hepatitis B Virus in Mice Induces Hepatocarcinogenesis Independent of Chronic Liver Injury
Source: PubMed Central journal article supplement (PMC3192172; doi:10.1371/journal.pone.0026240), 2011-10-12
Supplement: pone.0026240.s005.pdf [file pone.0026240.s005.pdf]

5' -ACCCATTAAAAACGGGGCTCAGAACTGAACAAAGAATTCTCACCTGAGGAATACCGAAT  
GGCAGAGAAGCACCTGAAAAATGTTCAACATCCTTAATCATCAGGGAAATGCAAATCAAAACA  
ACCCTGAGATTCTACCTCACACCAGTCAGAATGGCTAAGGGGGATGTGCTGCAAGGCGATTAAG  
TTGGGTAACGCCAGGGTTTTCCAGTCACGACGTTGTAAAACGACGGCCAGTGCCAAGCTTGCA  
TGCCTGCAGGTCGAATCCTGCCTTAATGCCTTTGTATGCATGTATACAAGCTAAACAGGCTTTC  
ACTTTCTCGCCAACTTACAAGGCCTTCTAAGTAAACAGTACATGAACCTTTACCCCGTTGCTC  
GGCAACGGCCTGGTCTGTGCCAAGTGTGCTGACGCAACCCCCACTGGCTGGGGCTTGCCAT  
AGGCCATCAGCGCATGCGTGGAACCTTTGTGGCTCCTCTGCCGATCCATAC-3'

**Figure S5.** Sequences at the junction of HBV (red) and mouse genomic (green) DNA in Mutant 1 Line-4 mice. The vector sequence is in black. The data is derived from sequencing the PCR product shown in Figure 6D. The DNA sequence in green shares 99.4% identity with 145980892-145980732 of mouse chromosome 1, part of a LINE1 retrotransposon in the 1qF region (UCSC Genome Browser).
