# Supplementary material for: Transgenic Expression of Entire Hepatitis B Virus in Mice Induces Hepatocarcinogenesis Independent of Chronic Liver Injury
Source: PubMed Central journal article supplement (PMC3192172; doi:10.1371/journal.pone.0026240), 2011-10-12
Supplement: pone.0026240.s007.pdf [file pone.0026240.s007.pdf]

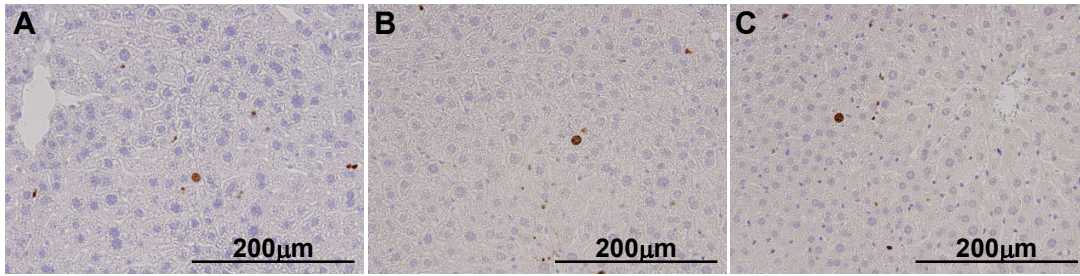

**Figure S7.** Immunohistochemical staining for Ki67 in liver of half-year-old non-transgenic (A), Mutant 1 (B), and wildtype HBV transgenic (C) mice.
